# Supplementary material for: The Successful Management of a 9-Year-Old Golden Retriever Treated for a Nasal Carcinoma with a Prednisolone/Chlorambucil Metronomic Combination after Radiation Therapy: A Case Report
Source: Preprints.org preprint supplement (doi:10.20944/preprints202408.2078.v2), 2024-09-09
Supplement: Supplementary file 1 [file supplementary]

**Consent form**

I,  Eun-jung Sohn , agree to participate in the research project regarding correlation between hyperlipidemia and thigh circumference

I have read and understand the information sheet given to me, including that:

- This research project is being undertaken by researchers from Bundang NewYork Animal hospital in order to collect qualitative data on the correlation between hyperlipidemia and thigh circumference to be used in submitting Veterinary Sciences.
- I understand that the findings of the research may be reported in this manuscript.
- I have been informed of the nature of the project.
- I am free to withdraw from the research at any time, should I so choose without any adverse consequences.
- I understand that any identifying information about me gathered in the course of this research is confidential and will not be used or published without my written permission.
- I understand that I will receive no financial benefit or compensation from publication of the article.

I understand that if I have any complaints or concerns about this research I can contact the principal investigator of the research project or alternatively I can contact:


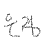

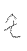


Signed by:
